# Supplementary material for: Thermoelectric performance optimization of n-type PbTe by In and Cu2Te co-doping and anomalous temperature-dependent transport
Source: Royal Society of Chemistry journal article supplement (doi:10.1039/d3ta08070f), 2024-01-01
Supplement: d3ta08070f1.pdf [file d3ta08070f1.pdf]

## Thermoelectric performance optimization of n-type PbTe by In and Cu<sub>2</sub>Te co-doping and anomalous temperature- dependent transports

Feng Gao <sup>a,b,1</sup>, Jianfeng Cai <sup>b,c,1</sup>, Mancang Li <sup>d</sup>, Zhiyu Chen <sup>d</sup>, Yu Wang <sup>d</sup>, Zongwei Zhang <sup>b</sup>, Lulu Chen <sup>b</sup>, Ding Hu <sup>b</sup>, Xiaojian Tan <sup>b,c</sup>, Jiehua Wu <sup>b</sup>, Guoqiang Liu <sup>b,c\*</sup>, Zhenhua Ge <sup>a\*</sup>, Jun Jiang <sup>b,c\*</sup>

<sup>a</sup> Faculty of Materials Science and Engineering, Kunming University of Science and Technology, Kunming 650093, China

<sup>b</sup> Ningbo Institute of Materials Technology and Engineering, Chinese Academy of Sciences, Ningbo 315201, China

<sup>c</sup> University of Chinese Academy of Sciences, Beijing, 100049, China

<sup>d</sup> Science and Technology on Reactor System Design Technology Laboratory, Nuclear Power Institute of China, Chengdu 610213, China

\*Corresponding authors, <sup>1</sup>These authors contributed equally

E-mail: liugq@nimte.ac.cn, zge@kust.edu.cn, jjun@nimte.ac.cn

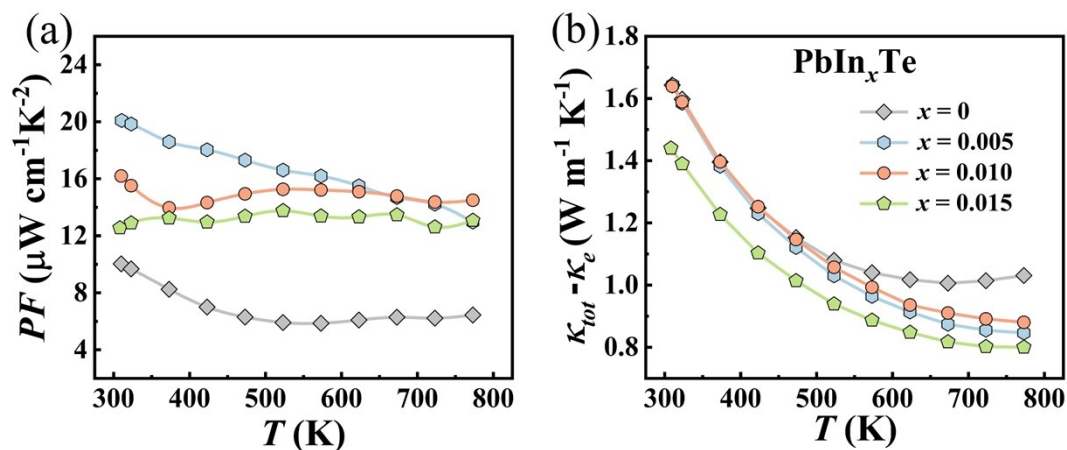

Figure S1. Temperature dependence of (a)  $PF$ , (b) lattice thermal conductivity  $\kappa_l$  for n-type PbIn<sub>x</sub>Te ( $x = 0, 0.005, 0.01, 0.015$ ).

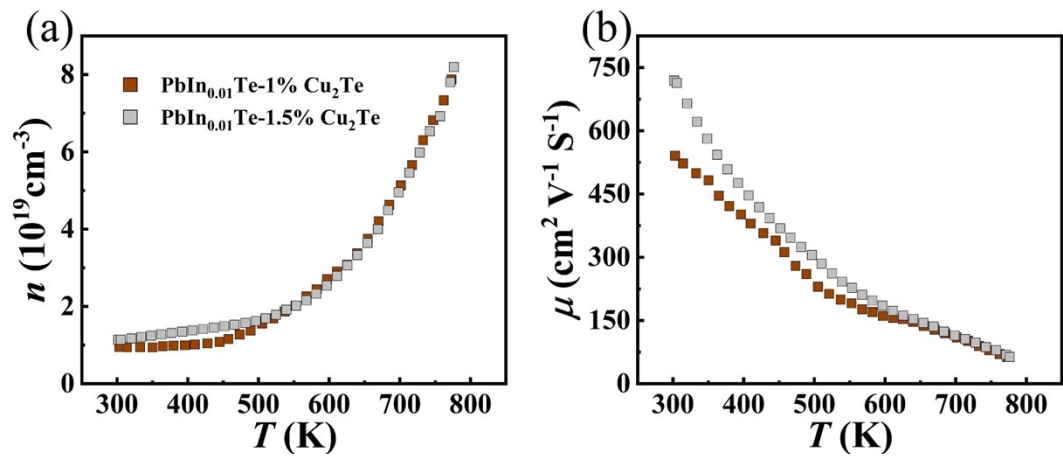

Figure S2. Temperature dependence of (a) carrier concentration, (b) carrier mobility for  $\text{PbIn}_{0.01}\text{Te}-y\%\text{Cu}_2\text{Te}$  ( $y = 1$ , and  $1.5$ )

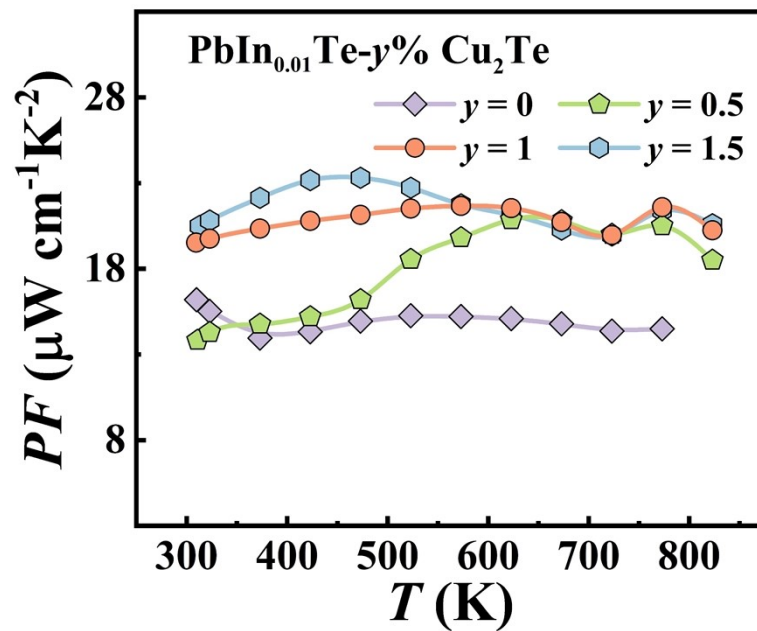

Figure S3. Temperature-dependent  $PF$  for  $n$ -type  $\text{PbIn}_{0.01}\text{Te}-y\%\text{Cu}_2\text{Te}$  ( $y = 0, 0.5, 1, 1.5$ )

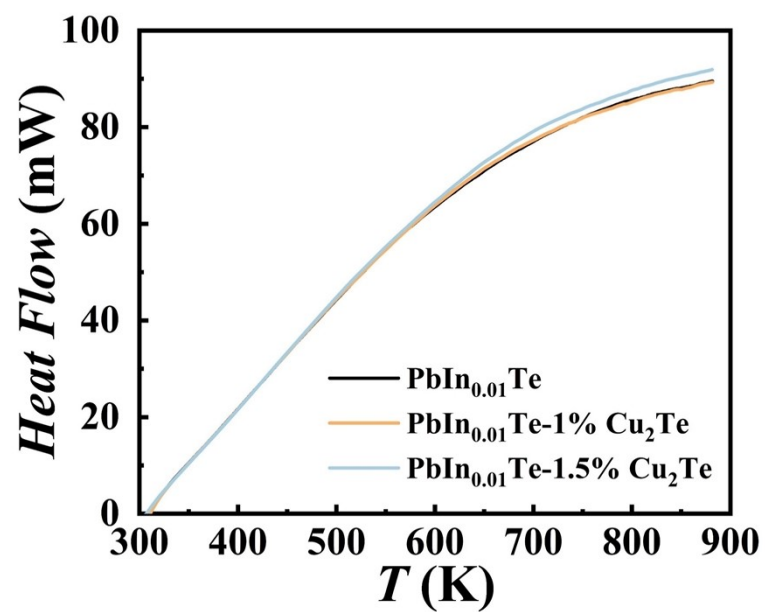

Figure S4. DSC testing of PbIn<sub>0.01</sub>Te, PbIn<sub>0.01</sub>Te -1% Cu<sub>2</sub>Te, and PbIn<sub>0.01</sub>Te-1.5% Cu<sub>2</sub>Te

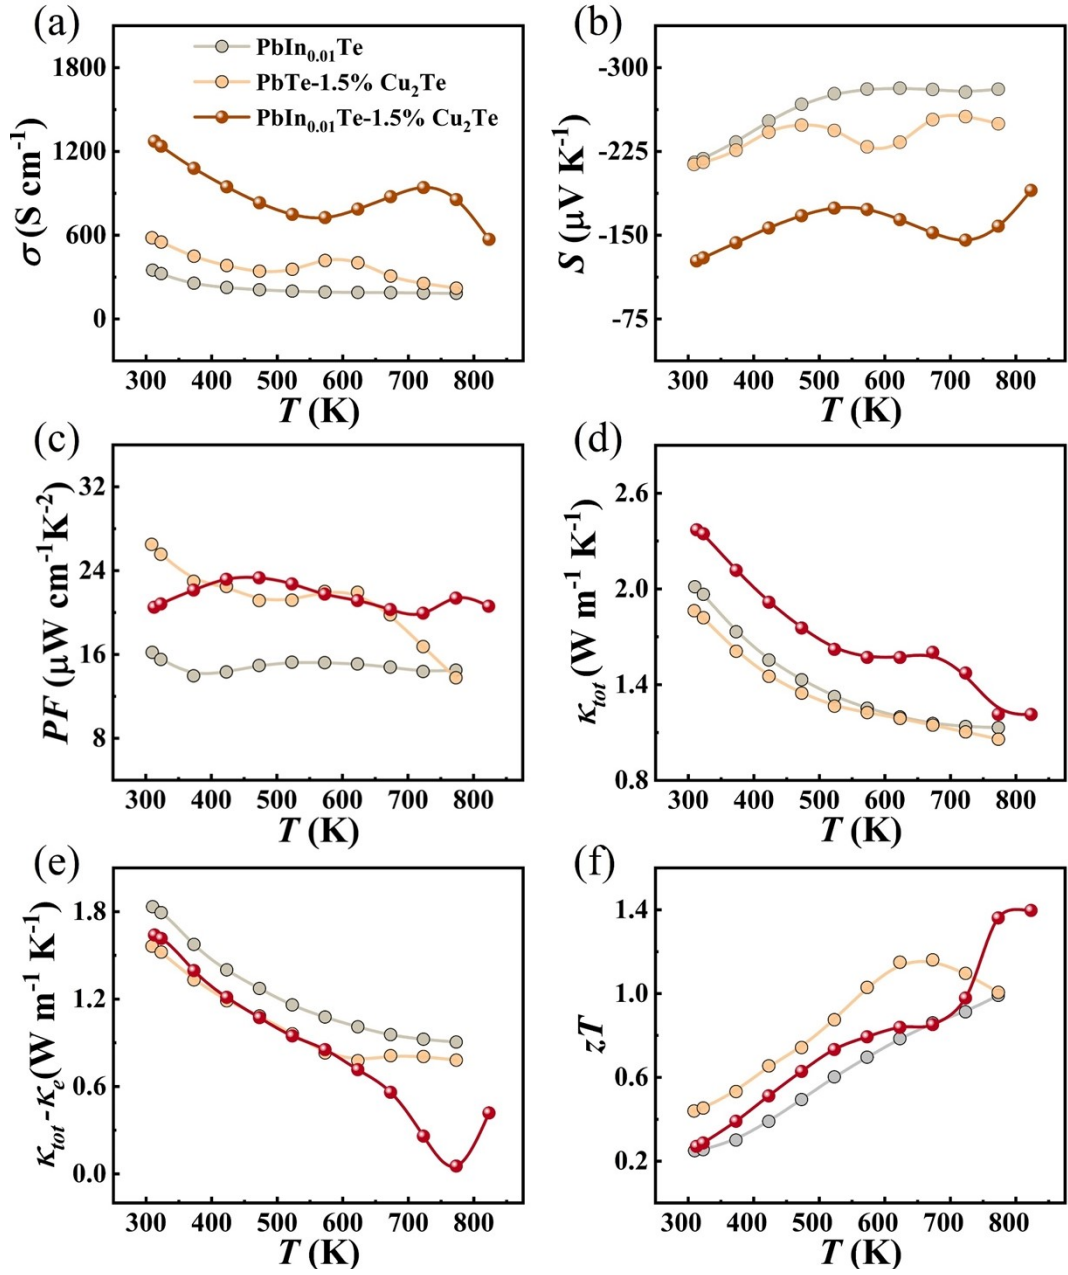

Figure S5. Temperature dependence of (a) electrical conductivity, (b) Seebeck coefficient, (c)  $PF$ , (d) total thermal conductivity  $\kappa_{tot}$ , (e) lattice thermal conductivity  $\kappa_l$ , and (f) figure of merit  $zT$  for  $n$ -type  $\text{PbIn}_{0.01}\text{Te}$ ,  $\text{PbTe-1.5\%Cu}_2\text{Te}$  and  $\text{PbIn}_{0.01}\text{Te-1.5\%Cu}_2\text{Te}$ .

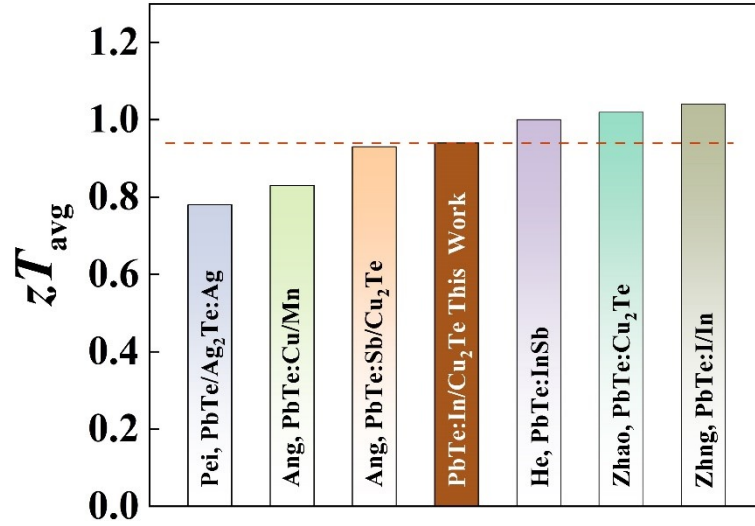

Figure S6. Compare of the corresponding  $zT_{\text{avg}}$  in this work with those of previous samples.<sup>[1-6]</sup>

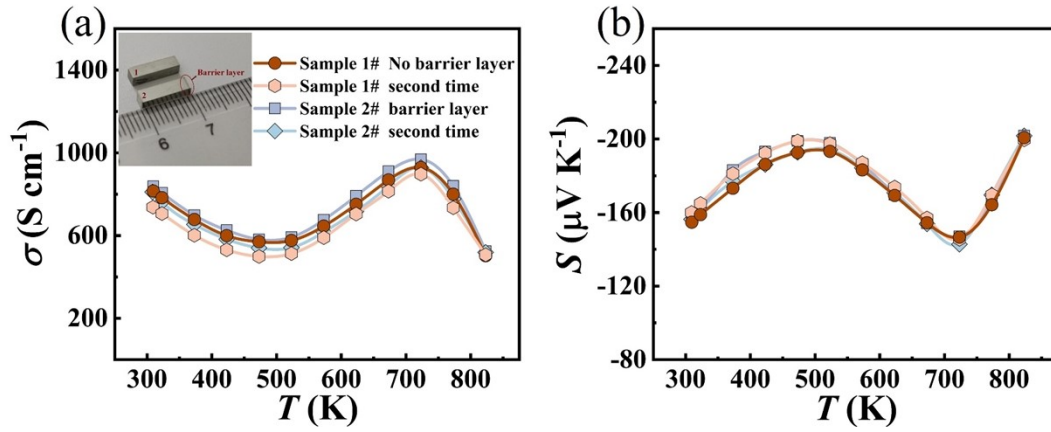

Figure S7. Temperature dependent for repeated measurements on (a) electrical conductivity, and (b) Seebeck coefficient for  $n$ -type  $\text{PbIn}_{0.01}\text{Te}-1\%\text{Cu}_2\text{Te}$ .

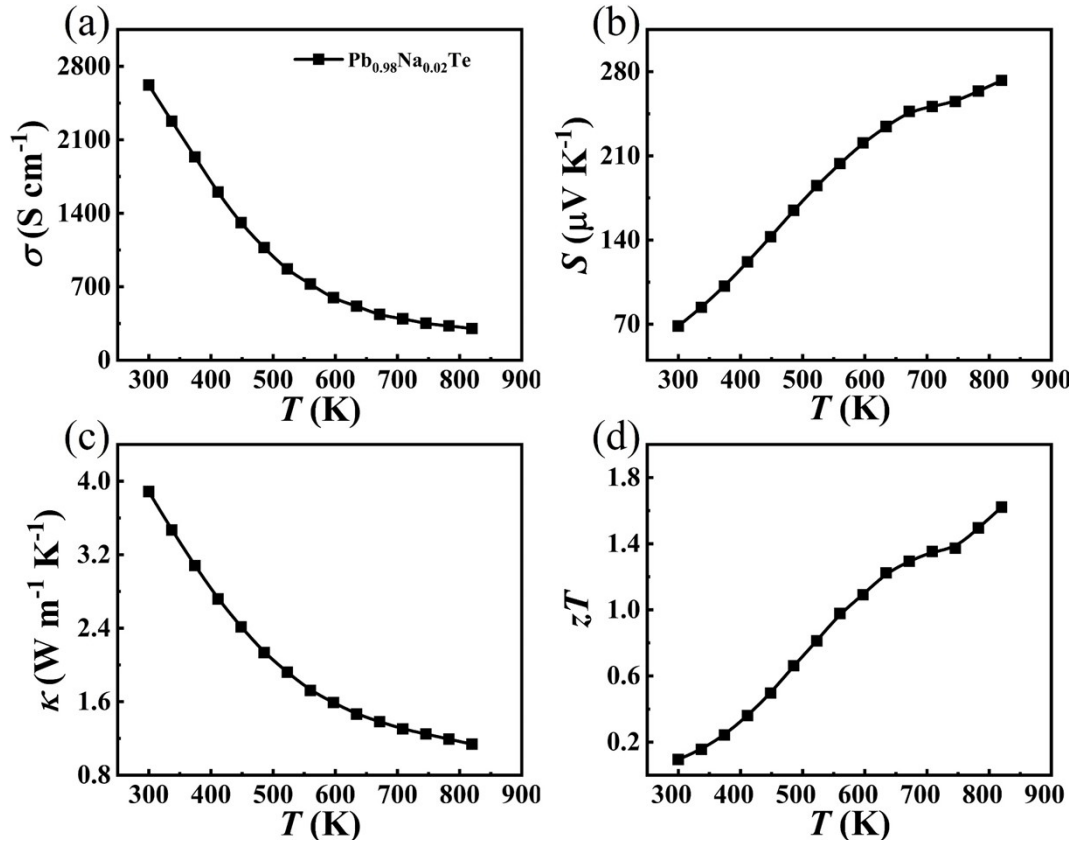

Figure S8. Temperature dependence of (a) electrical conductivity, (b) Seebeck coefficient, (c) total thermal conductivity and (d) figure of merit  $zT$  for  $p$ -type  $\text{Pb}_{0.98}\text{Na}_{0.02}\text{Te}$ .

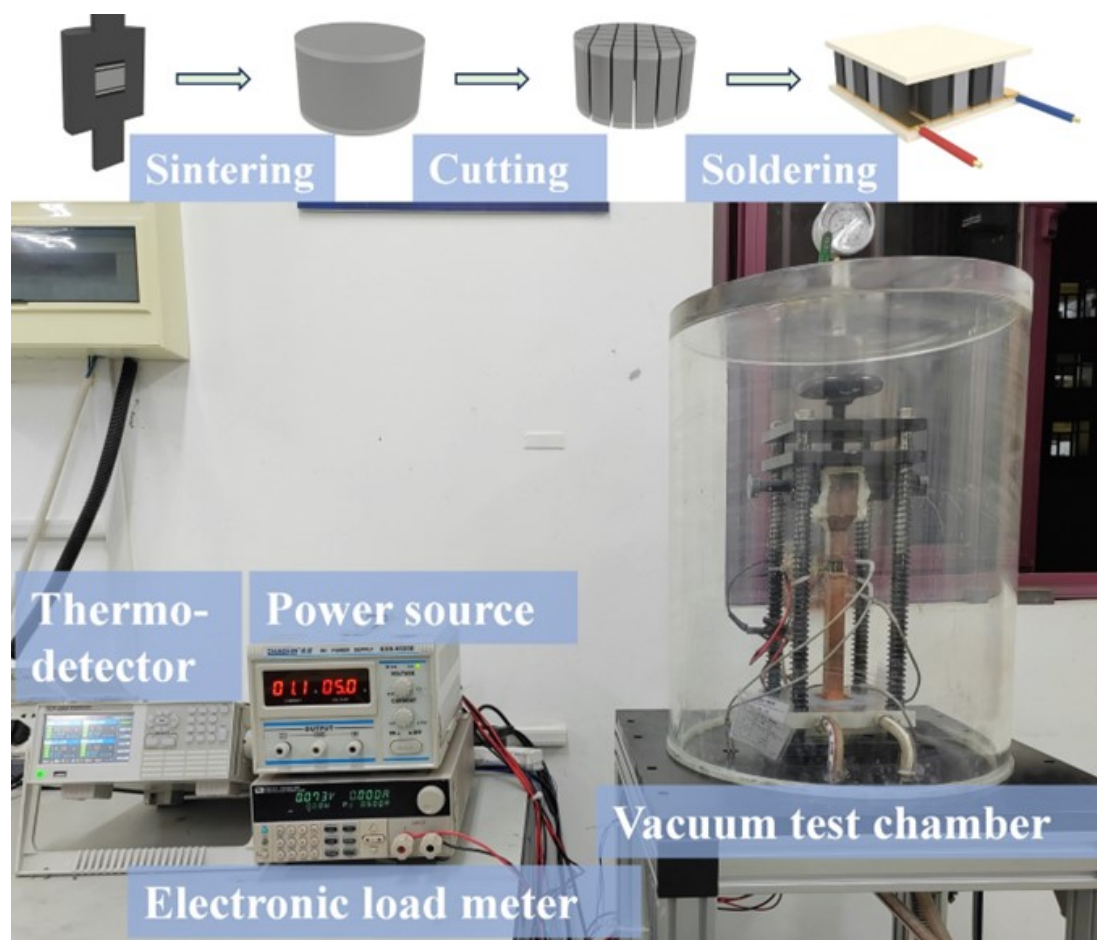

Figure S9. The flowchart of thermoelectric device preparation and home-built testing system for the thermoelectric device conversion efficiency  $\eta$  measurement.

Table S1 The temperature difference between the cold and hot ends of the device

| $T_h$ (K) | $T_c$ (K) | $\Delta T$ (K) |
|-----------|-----------|----------------|
| 385.6     | 285.26    | 100.34         |
| 490.34    | 291.09    | 199.25         |
| 601.18    | 301.55    | 299.63         |
| 698.56    | 299.5     | 399.06         |
| 751.94    | 301.64    | 450.30         |
| 804.15    | 303.55    | 500.60         |
| 825.81    | 305.78    | 520.03         |

## Reference

- [1] Y. Pei, A.F. May, G.J. Snyder, *Advanced Energy Materials* 1 (2011) 291-296

- [2] Y. Zhong, H. Liu, Q. Deng, F. Lv, L. Gan, R. Ang, ACS Appl Mater Interfaces 13 (2021) 52802-52810
- [3] H. Liu, Z. Chen, J. Tang, Y. Zhong, X. Guo, F. Zhang, R. Ang, ACS Appl Mater Interfaces 12 (2020) 52952-52958
- [4] J. Zhang, D. Wu, D. He, D. Feng, M. Yin, X. Qin, J. He, Adv Mater 29 (2017) 1703148
- [5] Y. Xiao, H. Wu, W. Li, M. Yin, Y. Pei, Y. Zhang, L. Fu, Y. Chen, S.J. Pennycook, L. Huang, J. He, L.-D. Zhao, J Am Chem Soc 139 (2017) 18732-18738
- [6] Q. Zhang, Q. Song, X. Wang, J. Sun, Q. Zhu, K. Dahal, X. Lin, F. Cao, J. Zhou, S. Chen, G. Chen, J. Mao, Z. Ren, Energy & Environmental Science 11 (2018) 933-940
